# Supplementary material
Source: PubMed Central journal article supplement (PMC3641600)
Supplement: cr201340x1.pdf [file cr201340x1.pdf]

**A**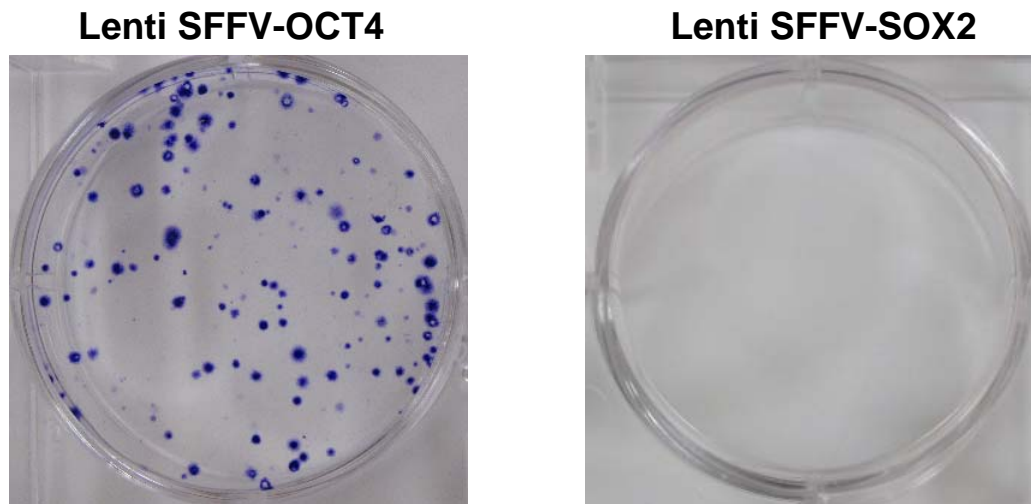**B**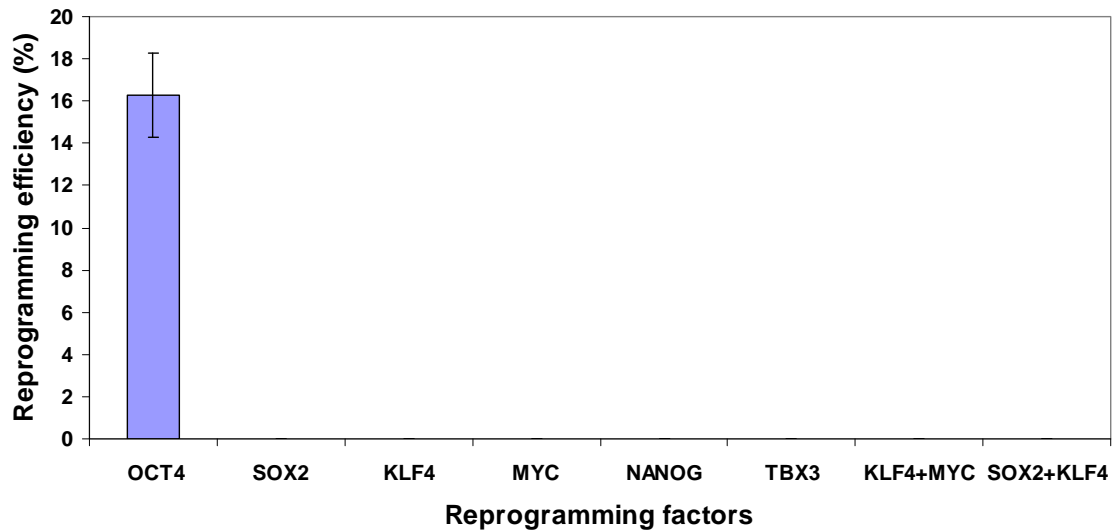

**Supplementary information, Figure S1: Successful Reprogramming of Cord Blood CD34<sup>+</sup> cells into iMSCs with OCT4 but not Other Factors.**

(A) Lenti SFFV-OCT4 but not Lenti SFFV-SOX2 transduced CB CD34<sup>+</sup> cells lead to efficient generation of iMSCs. After lentiviral transduction, 1000 cells were seeded in each well of 6-well plates. Colonies were counted 9 days later after crystal violet staining. (B) 16% OCT4-transduced CD34<sup>+</sup> cells formed colonies, while SOX2, KLF4, MYC, TBX3, NANOG, KLF4+MYC, SOX2+KLF4 transduced cells completely failed to form any iMSCs in the culture conditions we detailed in Methods.
