# Supplementary material
Source: PubMed Central journal article supplement (PMC3641600)
Supplement: cr201340x2.pdf [file cr201340x2.pdf]

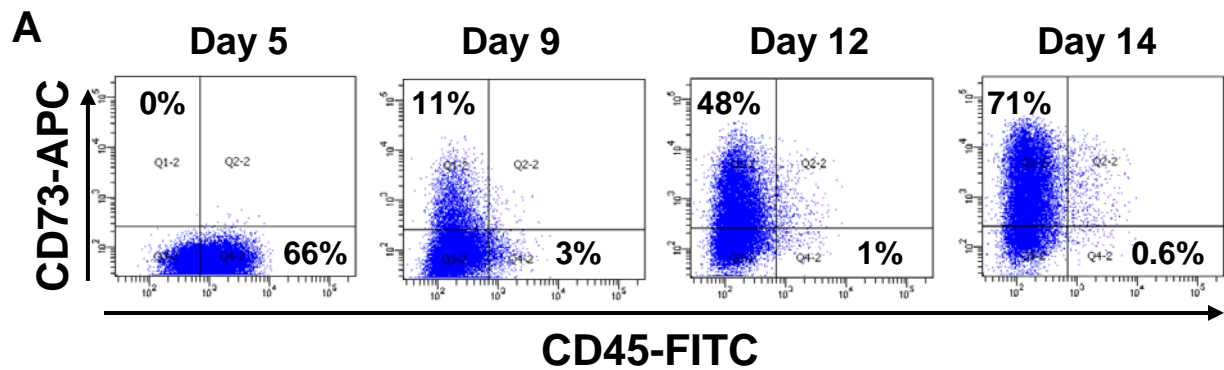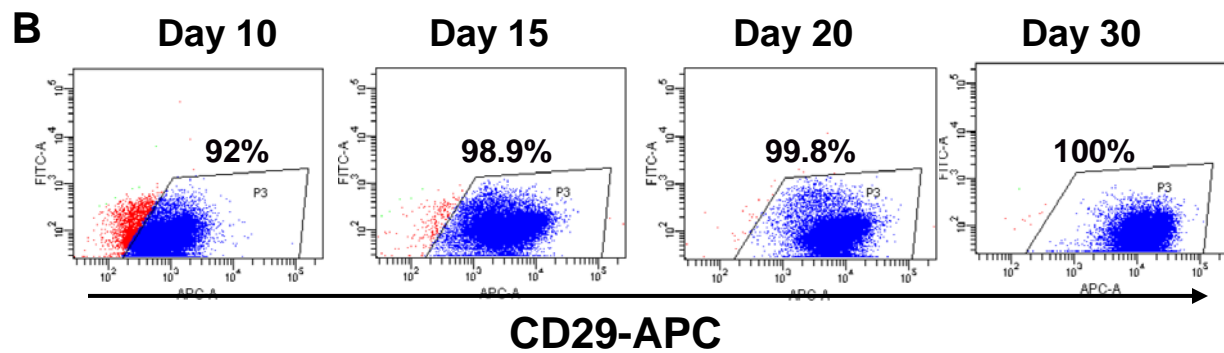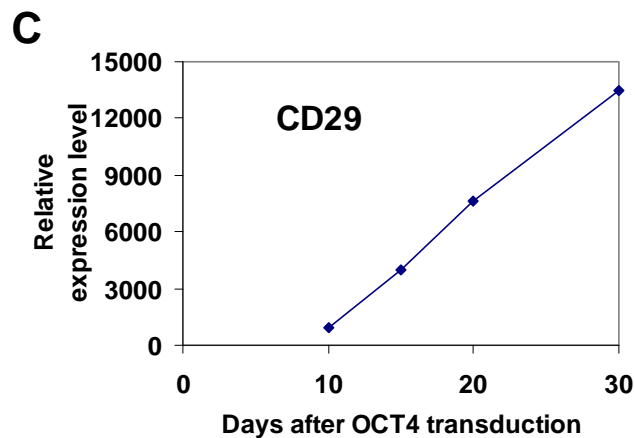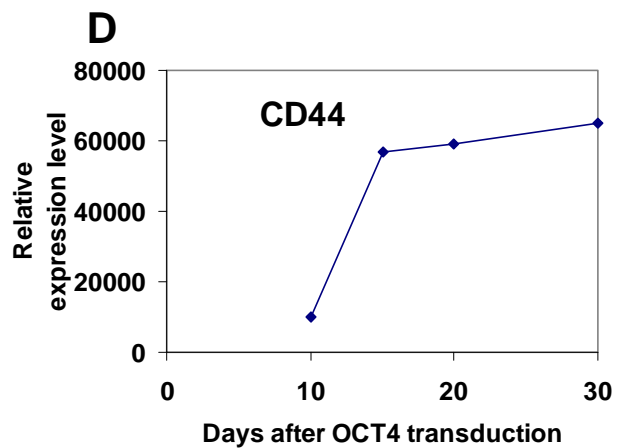

**Supplementary information, Figure S2: Transition of Hematopoietic Cells to IMSCs.**

(A) Flow cytometry plots showing the percentages of cells expressing the pan-hematopoietic marker CD45 and MSC marker CD73 at 5, 9, 12 and 14 days after Lenti SFFV-OCT4 transduction. (B) Flow cytometry plots showing the percentages of cells expressing the surface marker CD29 during transdifferentiation. (C) Increases in the mean expression level of CD29 over time during transdifferentiation as measured by flow cytometry. (D) Increases in the mean expression level of CD44 over time during transdifferentiation. In C and D, shown are the mean fluorescence intensities from one experiment representative of 3 independent experiments.
