# Supplementary material
Source: PubMed Central journal article supplement (PMC3641600)
Supplement: cr201340x3.pdf [file cr201340x3.pdf]

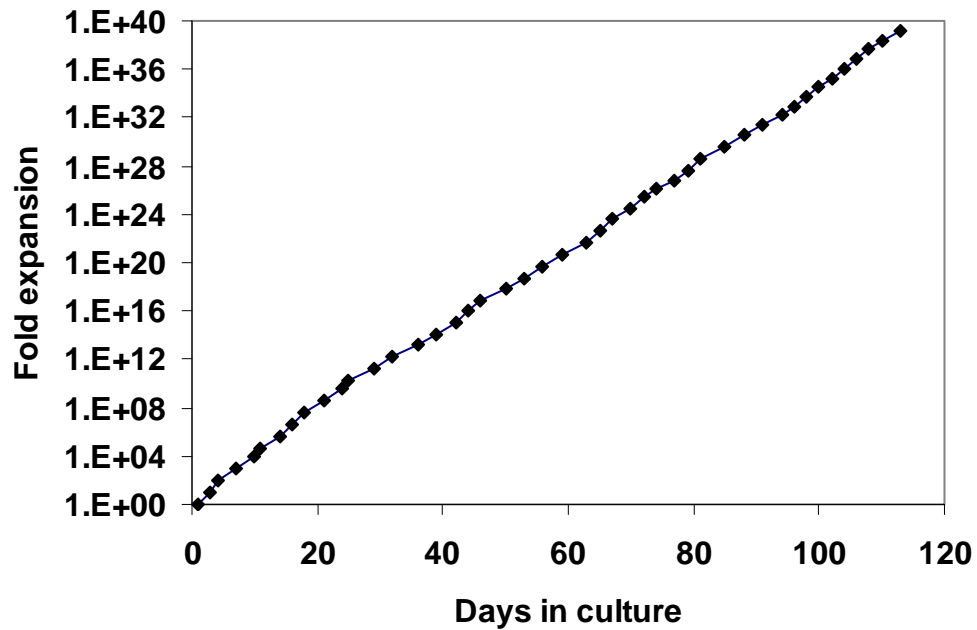

**Supplementary information, Figure S3: Long-term in vitro Culture of Cord Blood Lenti iMSCs.**

Cells were cultured in MSC medium supplemented with 3 mM CHIR in fibronectin-treated non-TC plates. Every 2-3 days, 1/4 to 1/6 of iMSCs in culture wells were split for further culture. Fold expansion was calculated by multiplying splitting factors of each passage. Shown is a representative of 5 experiments with similar results.
