# Supplementary material
Source: PubMed Central journal article supplement (PMC3641600)
Supplement: cr201340x4.pdf [file cr201340x4.pdf]

### Single CD34<sup>+</sup> cell cloning

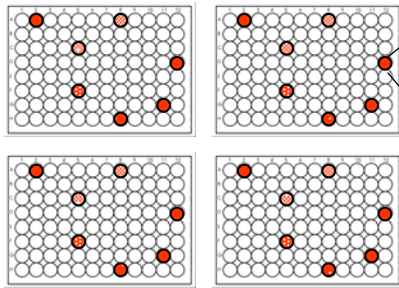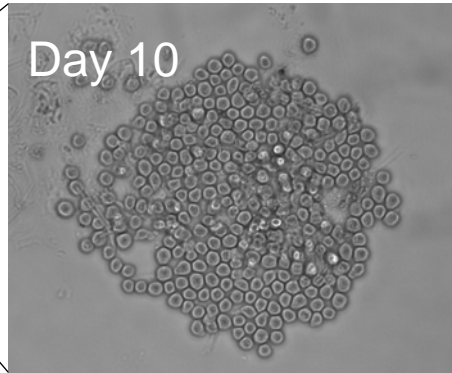

+ Lenti SFFV-OCT4

10 days after transduction

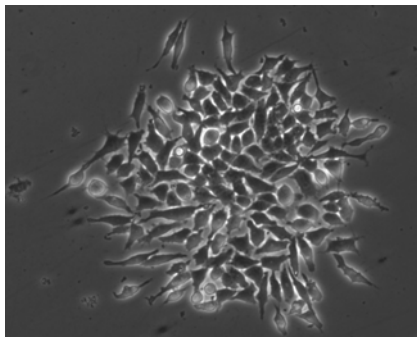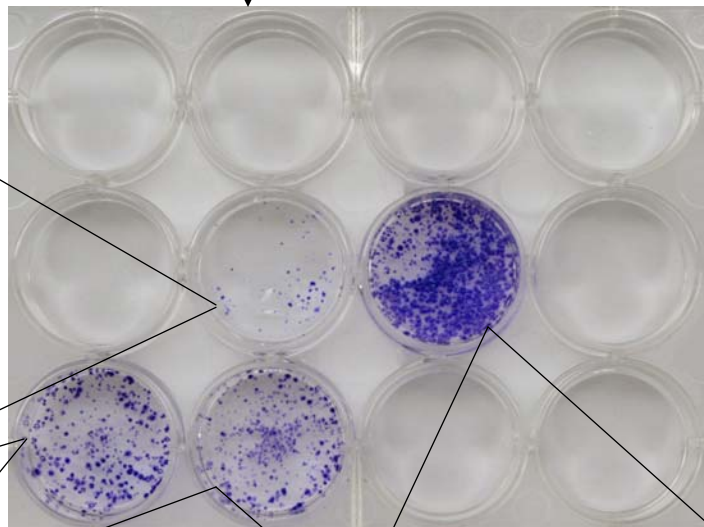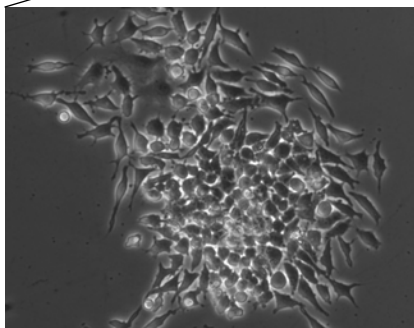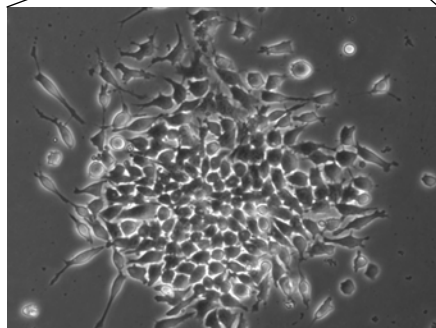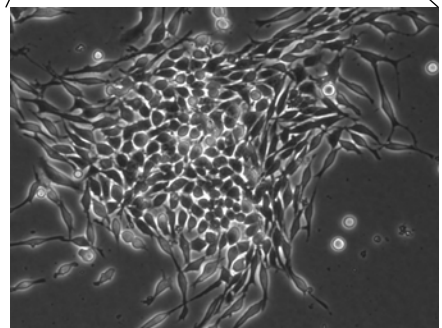

### Supplementary information, Figure S4: Efficient Generation of iMSCs from Cord Blood CD34<sup>+</sup> Cell Clones.

Single CB CD34<sup>+</sup> cells were seeded in U-bottomed 96-well plates. Ten days later, clones of more than 100 hematopoietic cells were formed in 10% wells. Progenies of single CD34<sup>+</sup> cells were transferred to a 12-well plate and transduced with OCT4. At 10 days after transduction, iMSCs were formed in 4 out of 12 wells.
