# Supplementary material
Source: PubMed Central journal article supplement (PMC3641600)
Supplement: cr201340x5.pdf [file cr201340x5.pdf]

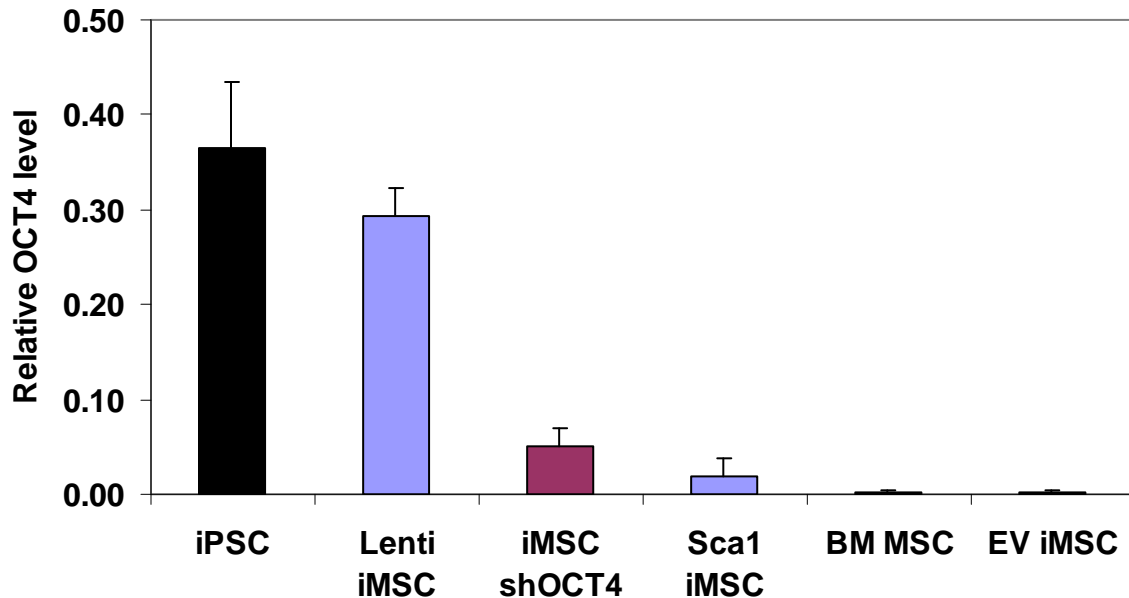

**Supplementary information, Figure S5: Relative *OCT4* Expression Levels in iMSCs.**

Real-time RT-PCR analysis was conducted to determine *OCT4* expression in iMSCs. iPSCs were used as a positive control and BM MSCs as a negative control. Relative *OCT4* expression is normalized to  $\beta$ -Actin (*ACTB*) expression in the cells. The data are shown as mean  $\pm$  SEM (n = 4-6). *OCT4* expression in Lenti iMSCs is similar to that of iPSCs ( $P > 0.05$ ). After *OCT4* knockdown with the sh*OCT4* lentiviral vector, *OCT4* expression decreased by ~80% ( $P < 0.001$ ). In EV iMSCs that were transduced with Sca1-*OCT4* (Sca1 iMSCs), *OCT4* levels were 5-10% of those in iPSCs. At one month after nucleofection with the episomal vector EV SFFV-*OCT4*, *OCT4* expression in EV iMSCs decreased by ~100-fold to baseline levels detected in BM MSCs.
