# Supplementary material
Source: PubMed Central journal article supplement (PMC3641600)
Supplement: cr201340x6.pdf [file cr201340x6.pdf]

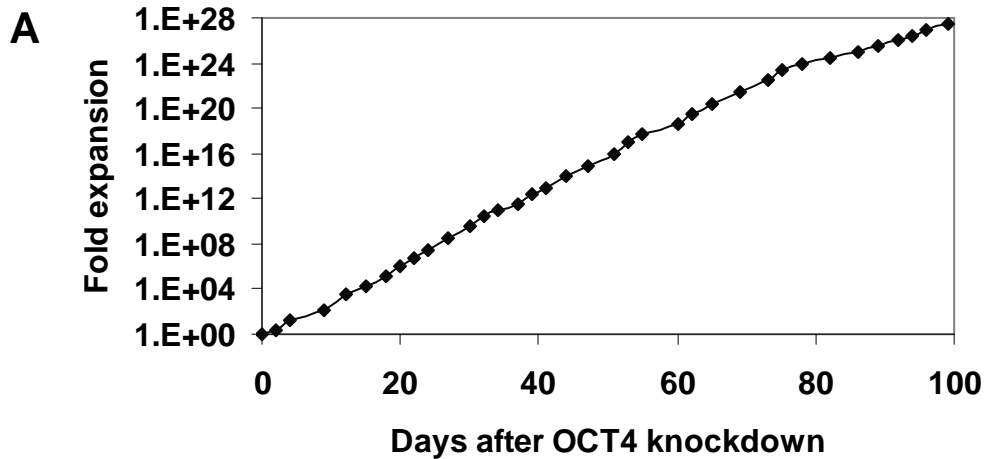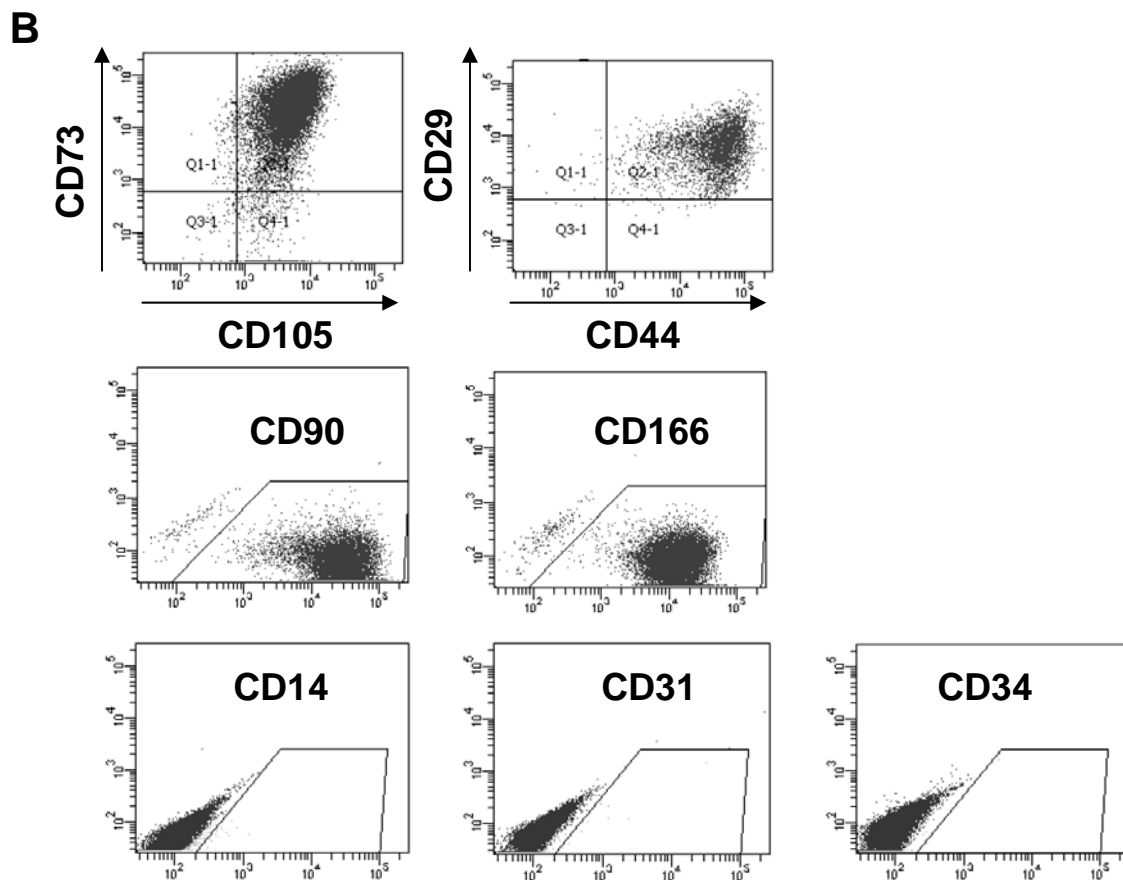

**Supplementary information, Figure S6: Long-term Culture and Phenotyping Analysis of Lenti iMSC shOCT4.**

(A) Cells were cultured in MSC medium supplemented with 3 mM CHIR in fibronectin-treated non-TC plates. Fold expansion was calculated by multiplying splitting factors of each passage. Shown is a representative of 3 independent experiments with similar results. (B) Flow cytometry plots show that cord blood Lenti iMSC shOCT4 express the MSC surface markers CD73, CD105, CD29, CD44, CD90, and CD166, while they do not express hematopoietic and endothelial markers CD14, CD31, and CD34.
