# Supplementary material
Source: PubMed Central journal article supplement (PMC3641600)
Supplement: cr201340x7.pdf [file cr201340x7.pdf]

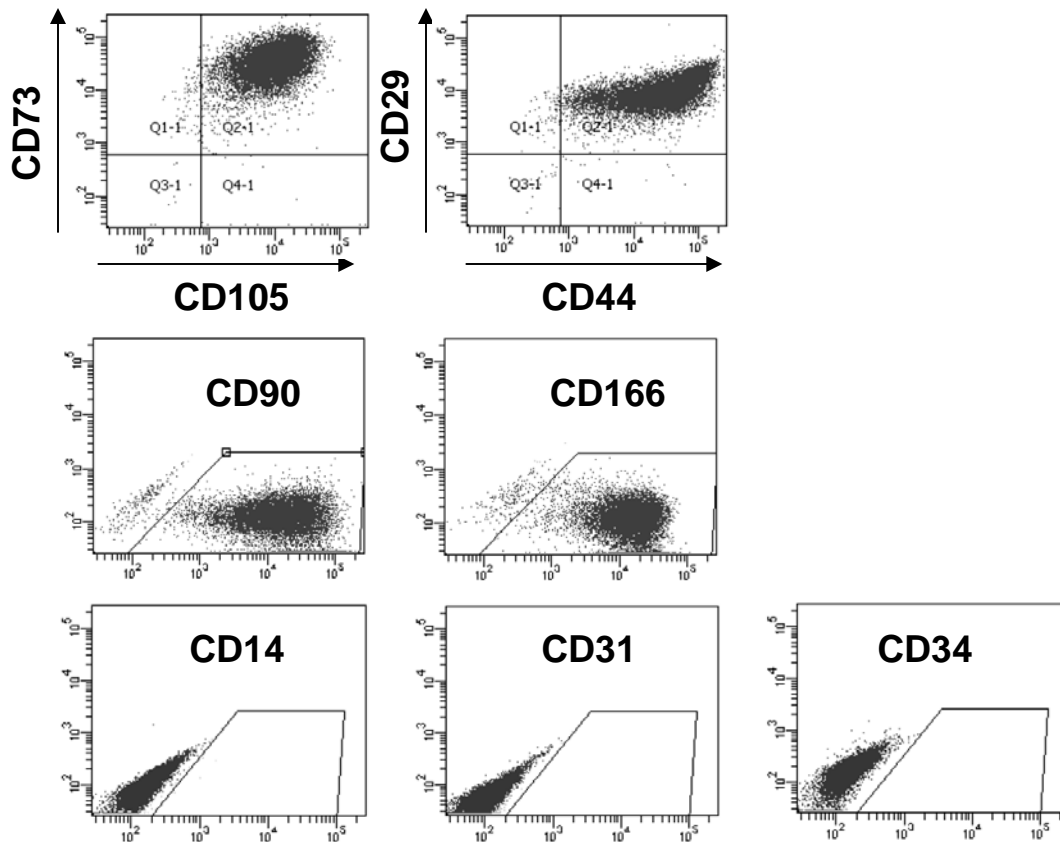

**Supplementary information, Figure S7: Phenotyping Analysis of EV iMSCs.**

Flow cytometry plots show that cord blood EV iMSCs express the MSC surface markers CD73, CD105, CD29, CD44, CD90, and CD166, while they do not express hematopoietic and endothelial markers CD14, CD31, and CD34. EV iMSCs were analyzed at Passage 10.
