# Supplementary material
Source: PubMed Central journal article supplement (PMC3641600)
Supplement: cr201340x8.pdf [file cr201340x8.pdf]

### BM MSC

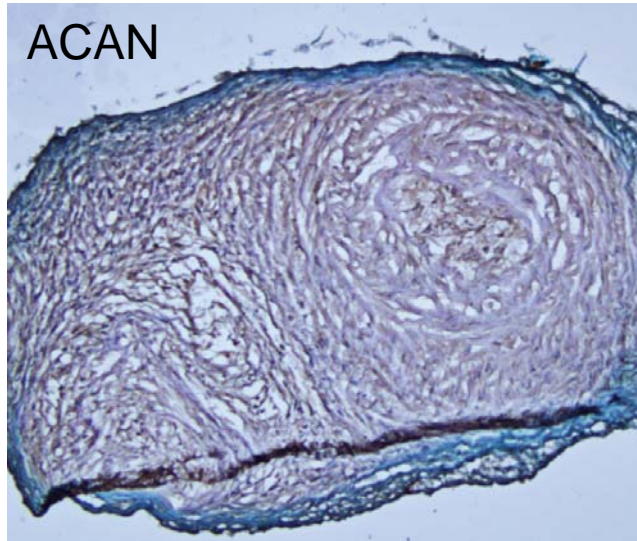

### EV iMSC

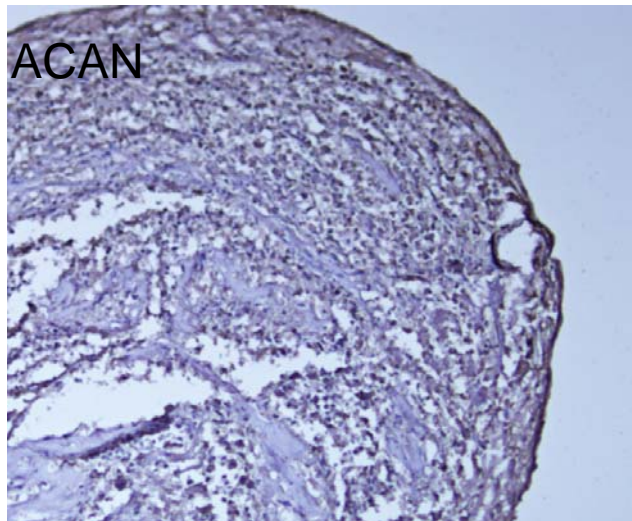

**Supplementary information, Figure S8: ACAN Immunostaining of BM MSCs and EV iMSCs after Chondrocytic Differentiation.**

BM MSCs and EV iMSCs were cultured in pellets in 15 ml tubes for induction of chondrocytic differentiation. After 3 weeks of culture, cryosections of pellets were stained with anti-ACAN.
